# Supplementary material for: The Aetiology of Ill Health Among Urban Slum Communities in Nigeria: A Systematic Review
Source: Research Square preprint supplement (doi:10.21203/rs.3.rs-5442979/v1), 2025-01-07
Supplement: Supplementary file 1 [file 0e8d8edaf5e713592bcd871b.docx]

| S/N | Author(s) | Year | Title | APPENDIX  Study Design | Sampling Method | Sample Size | Study Conclusion |
| --- | --- | --- | --- | --- | --- | --- | --- |
| 1 | Unachukwu et al.44 | 2024 | Water Sanitation and Hygiene Practices in Slums: A Case Study of Ilaje Slum in Lagos State, Nigeria | Case Study | Simple random | 319 | Call for a deliberate policy to provide good water supply conditions to encourage sanitary and hygienic behaviour among slum households |
| 2 | Iloerika-Okafor, et al.45 | 2024 | Evaluation of the Impact of Slum Environment on Residents of Ajegunle Slum | Survey | Purposive | 224 | Suggested enhancing educational opportunities, awareness creation, and collaborative initiatives for slum dwellers to increase knowledge of risks associated with unsanitary environment |
| 3 | Onuh et al.46 | 2024 | Informal-Formal Healthcare Services Delivery Nexus in Nigeria's Urban Slums: A Reconnaissance Study | Qualitative study | Purposive | 104 | Informal healthcare service providers are dominant in urban slums, and many of them cooperate and compete with formal providers. Supervision of informal providers in slums is inadequate |
| 4 | Mbachu et al.47 | 2024 | Assessing Knowledge of Hypertension and Diabetes Mellitus among Informal Healthcare Providers in Urban Slums in Southeastern Nigeria. | cross-sectional survey | Purposive | 256 | Training of informal healthcare providers is needed to address the critical knowledge deficit of risk factors and symptoms of hypertension and diabetes mellitus to better health outcomes and reduce disease burden in urban slums. |
| 5 | Adepoju et al.8 | 2023 | Health-Seeking Behavior Regarding Coughs in Urban Slums in Lagos, Nigeria | Cross-sectional Survey | Cluster sampling | 632 | Poor health-seeking behaviour, delay in seeking TB care, and preference for PPMVs emphasized the need for National TB programs to engage in formal treatment providers in slum communities |
| 6 | Oderinde et al.33 | 2023 | Food insecurity and associated factors among households with under-5 children in slum communities in Ibadan, Nigeria | Cross-sectional Survey | Cluster sampling | 1,027 | Household food insecurity was more prevalent in urban slums. Strengthening of the school health program would help identify children with nutritional deficits, and improve the overall health status of children living in slum communities. |
| 7 | Osuh et al.7 | 2023 | Oral health in an urban slum, Nigeria: residents’ perceptions, practices and care-seeking experiences | exploratory qualitative study | Random Selection | 58 | The slum residents experience various forms of dental ailments mostly pain‑related. The residents perceived formal dental clinics as unaffordable, thereby engaging in self‐care remedies and harmful oral health practices. |
| 8 | Aleru et al.48 | 2023 | WASH Practices Increased the Prevalence of Malnutrition among Under-five Children (6–59 months) in an Urban Slum Area in Ibadan, Nigeria. | Cross-sectional Survey | Purposive sampling | 200 | Access to unsafe water was significantly associated with child malnutrition. There is a need to educate and encourage mothers/caregivers to improve their hygiene practices in slum communities. |
| 9 | Balogun et al.49 | 2023 | Trends of Infant Vaccination Timeliness and Completion in Selected Urban Slum Communities in Ibadan, Southwestern Nigeria: A Four-Year Review. | Cross-sectional Survey | Records review | 5,934 | Infant vaccinations were significantly delayed and incomplete in the slum communities during the years reviewed. |
| 10 | Onuegbu et al.50 | 2023 | Use Characteristics and Influence of Lay Consultation Networks on Treatment-seeking Decisions in Slums of Nigeria: A Cross-Sectional Survey | Cross-sectional Survey | Purposive | 480 | Health programmes in urban slums should consider engaging community members to deliver reliable information about health and seeking treatment. |
| 11 | Fayehun et al.10 | 2022 | A Contextual Exploration of Healthcare Service Use in Urban Slums in Nigeria | Survey | Purposive | 1,634 | The cosmopolitan slum, situated in a major financial centre and national economic hub, had a higher proportion of formal healthcare facility usage than the migrant and indigenous slums where about half of families were classified as poor. |
| 12 | Balogun et al.51 | 2022 | Improving Timeliness and Completion of Infant Vaccination among Infants in Nigerian Urban Slums through Older Women’s Participation. | Experimental study | Random sampling | 496 | Training of older women caregivers improved infant vaccination timeliness and completion in urban slum communities. |
| 13 | Olatosi et al.52 | 2022 | Dental Caries and Oral Health: An Ignored Health Barrier to Learning in Nigerian Slums: A Cross Sectional Survey. | Cross-sectional survey | cluster sampling technique | 684 | dental caries, which was mainly untreated was moderately prevalent among the children surveyed in the urban slum. |
| 14 | Sekoni et al.53 | 2022 | The Relationship Between Protective Factors and Common Mental Disorders among Female Urban Slum Dwellers in Ibadan, Nigeria. | Cross-sectional survey | multistage sampling | 550 | Social support and resilience appear to be protective against common mental disorders among women living in slums |
| 15 | Akpabio et al.54 | 2021 | Slums, Women and Sanitary Living in South-South Nigeria. | Qualitative study | Simple random | 60 | women and girls bear disproportionate burden and risk of poor and inadequate WaSH services in slum communities |
| 16 | Onuegbu et al.55 | 2021 | Systematic Review of Lay Consultation in Symptoms and Illness Experiences in Informal Urban Settlements of Low-income and middle-income Countries. | Mixed-methods | Database search | 13 | Lay consultation is mainly sought from social networks in immediate environments in informal urban settlements of LMICs. |
| 17 | Obembe et al.56 | 2021 | Prevalence and Factors Associated with Catastrophic Health Expenditure among Slum and Non-Slum Dwellers Undergoing Emergency Surgery in a Metropolitan Area of South Western Nigeria. | Cross-sectional survey | multistage sampling | 450 | Catastrophic health expenditure was higher among the slum and non-slum dwellers, |
| 18 | Ogbonna et al.57 | 2021 | Public Health Problems Associated with Informal Settlements around Waterfront Communities in Port Harcourt, Nigeria | Cross-sectional Survey | simple random sample | 318 | They suggested that people living in slums are predisposed to severe outbreaks of epidemics, |
| 19 | Adebayo et al.58 | 2020 | Morbidity Pattern and Choice of Care in an Urban Slum of a Metropolitan State, Southwestern Nigeria. | Cross-sectional survey | random sampling | 480 | Disparities in morbidity patterns and access to care still persist in slum communities requiring urgent attention |
| 20 | Olubodun et al.59 | 2019 | Knowledge, Attitude and Practice of Cervical Cancer Prevention, among Women Residing in an Urban Slum in Lagos, South West, Nigeria. | Cross-sectional survey | Multistage sampling | 305 | There is a need for increased awareness creation and health education programs on cervical cancer prevention among women living in slums |
| 21 | Balogun et al.60 | 2019 | Predictors of Tuberculosis Knowledge, Attitudes and Practices in Urban Slums in Nigeria: A Cross-Sectional Study | Survey | Multistage random sampling | 504 | There is a need to improve the education about TB in the underserved slum communities. |
| 22 | Ekenze et al.61 | 2019 | The Prevalence of Stroke Survivors in Urban Slums in Enugu, Nigeria. | Cross-sectional survey | Multistage sampling | 1,440 | Public health educational measures, promoting prevention and early detection of diabetes should be encouraged. |

**Summary of included studies (n = 22)**
